# Supplementary material for: The effect of low‐level laser therapy on diabetic foot ulcers: A meta‐analysis of randomised controlled trials
Source: PubMed Central journal article supplement — Int Wound J. 2021 Mar 9;18(6):763–76. doi: 10.1111/iwj.13577 (PMC8613395; doi:10.1111/iwj.13577), 2021-03-09
Supplement: IWJ-18-763-s002.pdf [file IWJ-18-763-s002.pdf]

**Supplementary Table 1.** PubMed's detailed search process and search results.

| Search | Details                                                                                                                                                                                                                                                                                                                                                                                      | Results |
|--------|----------------------------------------------------------------------------------------------------------------------------------------------------------------------------------------------------------------------------------------------------------------------------------------------------------------------------------------------------------------------------------------------|---------|
| #1     | (diabetic foot[MeSH Terms]) OR (diabetic ulcer[Title/Abstract] OR diabetic foot[Title/Abstract] OR diabetic foot ulcer[Title/Abstract] OR foot ulcer[Title/Abstract])                                                                                                                                                                                                                        | 12,460  |
| #2     | (Low-Level Light Therapy[MeSH Terms]) OR (low-level light therapy[Title/Abstract] OR LLLT[Title/Abstract] OR low-level laser therapy[Title/Abstract] OR phototherapy[Title/Abstract] OR laser[Title/Abstract])                                                                                                                                                                               | 274,014 |
| #3     | ((Low-Level Light Therapy[MeSH Terms]) OR (low-level light therapy[Title/Abstract] OR LLLT[Title/Abstract] OR low-level laser therapy[Title/Abstract] OR phototherapy[Title/Abstract] OR laser[Title/Abstract])) AND ((diabetic foot[MeSH Terms]) OR (diabetic ulcer[Title/Abstract] OR diabetic foot[Title/Abstract] OR diabetic foot ulcer[Title/Abstract] OR foot ulcer[Title/Abstract])) | 215     |

**Supplementary Table 2.** Sensitivity analysis results (complete healing rate)

| Author(year) | Q-test <i>P</i> | I <sup>2</sup> | RR [95%CI]        | <i>p</i> -value |
|--------------|-----------------|----------------|-------------------|-----------------|
| Chen2003     | 0.33            | 13%            | 2.05 [1.50, 2.79] | <0.00001        |
| Chi2002      | 0.28            | 19%            | 2.20 [1.57, 3.10] | <0.00001        |
| Cui2009      | 0.27            | 20%            | 2.18 [1.57, 3.03] | <0.00001        |
| Kaviani2011  | 0.28            | 19%            | 2.12 [1.55, 2.90] | <0.00001        |
| Landau2011   | 0.33            | 13%            | 2.06 [1.51, 2.81] | <0.00001        |
| Minatel2009  | 0.44            | 0%             | 2.00 [1.48, 2.71] | <0.00001        |
| Ortiz2014    | 0.68            | 0%             | 2.26 [1.63, 3.15] | <0.00001        |
| Ouyang2010   | 0.68            | 0%             | 1.89 [1.39, 2.58] | <0.0001         |
| Zhang2012    | 0.29            | 17%            | 2.17 [1.58, 2.96] | <0.00001        |

RR: risk ratio.

For Review Only

**Supplementary Table 3.** Subgroup analysis of ulcer area reduction percentage.

| Subgroup                                           | Number of studies | I <sup>2</sup> | Estimated Effect   |
|----------------------------------------------------|-------------------|----------------|--------------------|
| <b>1. Subgroup by control groups' intervention</b> |                   |                |                    |
| Placebo                                            | 2                 | 94%            | 4.47 [-0.55, 9.49] |
| Traditional treatment                              | 3                 | 94%            | 3.04 [0.55, 5.52]  |
| <b>2. Subgroup by sample size</b>                  |                   |                |                    |
| Large                                              | 1                 | -              | 5.21 [4.19, 6.23]  |
| Small                                              | 4                 | 89%            | 3.02 [1.18, 4.87]  |
| <b>3. Subgroup by treatment time</b>               |                   |                |                    |
| 4 weeks                                            | 3                 | 92%            | 3.14 [0.50, 5.78]  |
| 15 days                                            | 2                 | 88%            | 4.10 [1.92, 6.28]  |
| <b>4. Subgroup by wagner grade</b>                 |                   |                |                    |
| Wagner I                                           | 2                 | 88%            | 4.10 [1.92, 6.28]  |
| Wagner II                                          | 3                 | 92%            | 3.14 [0.50, 5.78]  |

**Supplementary Table 4.** Sensitivity analysis (ulcer area reduction percentage)

| Author(year) | Q-test p | I <sup>2</sup> | RR [95%]          | p-value |
|--------------|----------|----------------|-------------------|---------|
| Hoseini2016  | <0.00001 | 92%            | 2.78 [0.95, 4.60] | 0.003   |
| Kajagar2012  | <0.00001 | 89%            | 3.02 [1.18, 4.87] | 0.001   |
| Kaviani2011  | <0.00001 | 94%            | 3.94 [1.56, 6.32] | 0.001   |
| Mathur2017   | <0.00001 | 94%            | 3.70 [1.24, 6.16] | 0.003   |
| Santos2018   | <0.00001 | 90%            | 4.18 [2.26, 6.09] | <0.0001 |

RR: risk ratio.

For Review Only
